# Supplementary material for: Effects of Blue and Red Light On Growth And Nitrate Metabolism In Pakchoi
Source: publisher site journal article supplement (doi:10.1515/chem-2019-0038), 2019-07-12
Supplement: Supplementary file 1 [file chem-2019-0038_sm.pdf]

## Supplementary Information

Xiao-Xue Fan , Feng Xue , Bo Song, Long-Zheng Chen, Gang Xu\*, Hai Xu\*

# Effects of Blue and Red Light On Growth And Nitrate Metabolism In Pakchoi

**Table S1:** Standard operating table of determination of glutamine.

| Reagents (ml)                                                                                                                                                      | Blank tube | Standard tube | Test tube |
|--------------------------------------------------------------------------------------------------------------------------------------------------------------------|------------|---------------|-----------|
| Double steaming water                                                                                                                                              | 0.01       |               |           |
| Two mmol/L fluid of glutamine standard application                                                                                                                 |            | 0.01          | 0.01      |
| Sample                                                                                                                                                             |            |               | 0.03      |
| Acetate buffer                                                                                                                                                     | 0.03       | 0.03          | 0.03      |
| Glutaminase                                                                                                                                                        | 0.01       | 0.01          | 0.01      |
| Mix solution and then use water bath at 37 °C for 15min.                                                                                                           |            |               |           |
| Glutamine Standard solution                                                                                                                                        | 1.0        | 1.0           | 1.0       |
| Indenone solution                                                                                                                                                  | 1.0        | 1.0           | 1.0       |
| After completing the above steps, mix solution and then use water bath at 37 °C for 15min. Zero with double steaming water, and the absorbance was read at 630 nm. |            |               |           |

Glutamine concentration was calculated using the following formula:

$$\frac{\text{measured value of OD} - \text{blank value of OD}}{\text{standard value of OD} - \text{blank value of OD}} \times \text{standard concentration} \div \text{sample quality}$$

**Table S2:** Standard operating table of determination of glutamic acid

| Reagents (ml)                                                                                                                                                                                                        | Blank tube | Standard tube | Test tube |
|----------------------------------------------------------------------------------------------------------------------------------------------------------------------------------------------------------------------|------------|---------------|-----------|
| Double steaming water                                                                                                                                                                                                | 0.5        |               |           |
| 200 μmol L <sup>-1</sup> fluid of glutamic acid standard application                                                                                                                                                 |            | 0.5           |           |
| The supernatant                                                                                                                                                                                                      |            |               | 0.5       |
| Tris-EDTA-Hydrazine buffer                                                                                                                                                                                           | 1.0        | 1.0           | 1.0       |
| Adenine Dinucleotide solution                                                                                                                                                                                        | 0.1        | 0.1           | 0.1       |
| 5'-Diphosphate solution                                                                                                                                                                                              | 0.01       | 0.01          | 0.01      |
| Double steaming water                                                                                                                                                                                                | 0.39       | 0.39          | 0.39      |
| Mix solution, zero with double steaming water , then the absorbance was read at 340 nm. Absorbance of each tube mark as A <sub>1</sub> .                                                                             |            |               |           |
| Glutamic Dehydrogenase                                                                                                                                                                                               | 0.02       | 0.02          | 0.02      |
| After completing the above steps, mix solution and then use water bath at 37 °C for 40 min. Zero with double steaming water, and the absorbance was read at 340 nm. Absorbance of each tube mark as A <sub>2</sub> . |            |               |           |

Glutamic acid concentration was calculated using the following formula:

$$\frac{(\text{measured value of A}_2 - \text{measured value of A}_1) - (\text{blank value of A}_2 - \text{blank value of A}_1)}{(\text{standard value of A}_2 - \text{standard value of A}_1) - (\text{blank value of A}_2 - \text{blank value of A}_1)} \times \text{standard concentration} \div \text{sample quality}$$
